# Supplementary material for: Design, Synthesis, Characterization, and Analysis of Antimicrobial Property of Novel Benzophenone Fused Azetidinone Derivatives through In Vitro and In Silico Approach
Source: MDPI journal article supplement (doi:10.3390/cimb45010007), 2022-12-23

## Supplementary Material

# Design, Synthesis, Characterization, and Analysis of Antimicrobial Property of Novel Benzophenone Fused Azetidinone Derivatives through In Vitro and In Silico Approach

Lakshmi Ranganatha Venkataravanappa <sup>1</sup>, Mahima Jyothi <sup>2</sup>, Hussien Ahmed Khamees <sup>3</sup>, Ekaterina Silina <sup>4,5</sup>, Victor Stupin <sup>4</sup>, Raghu Ram Achar <sup>6,\*</sup>, Mohammed Al-Ghorbani <sup>7,8</sup> and Shaukath Ara Khanum <sup>2,\*</sup>

<sup>1</sup> Department of Chemistry, The National Institute of Engineering, Mysuru 570008, Karnataka, India

<sup>2</sup> Department of Chemistry, Yuvaraja's College (Autonomous), University of Mysore, Mysuru 570005, Karnataka, India

<sup>3</sup> Department of Medical Science, Community College-Abs, Hajjah ABS-00967, Yemen

<sup>4</sup> Department of Surgery, Pirogov Russian National Research Medical University, 117997 Moscow, Russia

<sup>5</sup> Institute of Biodesign and Modeling of Complex Systems, I.M. Sechenov First Moscow State Medical

University (Sechenov University), 119435 Moscow, Russia

<sup>6</sup> Division of Biochemistry, School of Life Sciences, JSS Academy of Higher Education & Research, Mysuru 570015, Karnataka, India

<sup>7</sup> Department of Chemistry, College of Science and Arts, Ulla, Taibah University, Medina 41477, Saudi Arabia

<sup>8</sup> Department of Chemistry, College of Education, Tamar University, Tamar-425897, Yemen

\* Correspondence: rracharya@jssuni.edu.in (R.R.A.); shaukathara@yahoo.co.in (S.A.K.)

## 2. Materials and Methods: Characterization Data

### 2.1. Chemistry

#### 2.1.1. Characterization data for 3(a-b)

**2-Methylphenyl benzoate 3a:** Yield 90%, Pale yellow liquid. IR (Nujol): 1715 cm<sup>-1</sup> (C=O). <sup>1</sup>H NMR (DMSO): δ 2.45 (s, 3H, Ar-CH<sub>3</sub>), 7.0-7.8 (m, 9H, Ar-H). MS: *m/z* 213 (M+1). Anal. Calcd. For C<sub>14</sub>H<sub>12</sub>O<sub>2</sub> (212): C, 79.22; H, 5.70. Found: C, 79.18; H, 5.76%.

**2-Methylphenyl-2-chlorobenzoate 3b:** Yield 84%, Colour less liquid. IR (Nujol): 1710 cm<sup>-1</sup> (C=O). <sup>1</sup>H NMR (DMSO): δ 2.33 (s, 3H, Ar-CH<sub>3</sub>), 7.1-8.0 (m, 8H, Ar-H). MS: *m/z* 247 (M+), 249 (M+2). Anal. Calcd. For C<sub>14</sub>H<sub>11</sub>ClO<sub>2</sub> (247): C, 68.16; H, 4.49. Found: C, 68.19; H, 4.53%.

#### 2.1.2. Characterization data for 4(a-b)

**(4-Hydroxy-3-methylphenyl)(phenyl)methanone 4a:** Yield 72%, M.P. 110-112°C. IR (Nujol): 1640 (C=O), 3510-3600 cm<sup>-1</sup> (OH). <sup>1</sup>H NMR (DMSO): δ 2.35 (s, 3H, CH<sub>3</sub>), 6.71-7.70 (m, 8H, Ar-H), 13.0 (bs, 1H, -OH). MS: *m/z* 213 (M+1). Anal. Calcd. For C<sub>14</sub>H<sub>12</sub>O<sub>2</sub> (212.08): C, 79.22; H, 5.70. Found: C, 72.23; H, 5.69%.

**(4-Hydroxy-3-methylphenyl)(2-chlorophenyl)methanone 4b:** Yield 78%, M.P. 120-122°C. IR (Nujol): 1645 (C=O), 3520-3650 cm<sup>-1</sup> (OH). <sup>1</sup>H NMR (DMSO): δ 2.33 (s, 3H, CH<sub>3</sub>), 6.73-7.71 (m, 7H, Ar-H), 12.10 (bs, 1H,

-OH). MS:  $m/z$  246 (M+), 249 (M+2). Anal. Calcd. For  $C_{14}H_{11}ClO_2$  (24): C, 68.16; H, 4.49. Found: C, 68.19; H, 4.53%.

### 2.1.3. Characterization data for 5(a-b)

**Ethyl 2-(4-benzoyl-2-methylphenoxy) acetate 5a:** Yield 90%, M.P. 49-52°C. IR (Nujol): 1664 (C=O), 1760  $cm^{-1}$  (ester, C=O).  $^1H$  NMR (DMSO):  $\delta$  1.2 (t, 3H,  $CH_3$  of ester), 2.3 (s, 3H,  $CH_3$ ), 4.1 (q, 2H,  $CH_2$  of ester), 4.5 (s, 2H,  $OCH_2$ ), 7.1-7.7 (m, 8H, Ar-H). MS:  $m/z$  299 (M+1). Anal. Calcd. For  $C_{18}H_{18}O_4$  (298): C, 72.48; H, 6.04. Found: C, 72.46; H, 6.02%.

**Ethyl 2-(4-(2-chlorobenzoyl)-2-methylphenoxy)acetate 5b:** Yield 86%, M.P. 52-55°C. IR (Nujol): 1675 (C=O), 1755  $cm^{-1}$  (ester, C=O).  $^1H$  NMR (DMSO):  $\delta$  1.22 (t, 3H,  $CH_3$  of ester), 2.4 (s, 3H,  $CH_3$ ), 4.15 (q, 2H,  $CH_2$  of ester), 4.6 (s, 2H,  $OCH_2$ ), 6.9-7.8 (m, 7H, Ar-H). MS:  $m/z$  333 (M+), 335 (M+2). Anal. Calcd. For  $C_{18}H_{17}ClO_4$  (333): C, 64.97; H, 5.15. Found: C, 64.99; H, 5.19%.

### 2.1.4. Characterization data for 6(a-b)

**2-(4-Benzoyl-2-methylphenoxy)acetohydrazide 6a:** Yield 80%, M.P. 125-128°C. IR (Nujol): 1630 (C=O), 1670 (amide, C=O), 3120-3220  $cm^{-1}$  (NH-NH<sub>2</sub>).  $^1H$  NMR (DMSO):  $\delta$  2.2 (s, 3H, Ar- $CH_3$ ), 3.55 (bs, 2H, NH<sub>2</sub>), 4.6 (s, 2H,  $CH_2$ ), 7.2-7.8 (m, 8H, Ar-H), 9.35 (bs, 1H, CONH). MS:  $m/z$  286 (M+1). Anal. Calcd. for  $C_{16}H_{16}N_2O_3$  (285): C, 67.59; H, 5.67; N, 9.85. Found: C, 67.65; H, 5.74; N, 9.91%.

**2-(4-(2-Chlorobenzoyl)-2-methylphenoxy)acetohydrazide 6b:** Yield 85%, M.P. 140-142°C. IR (Nujol): 1636 (C=O), 1676 (amide, C=O), 3115-3210  $cm^{-1}$  (NH-NH<sub>2</sub>).  $^1H$  NMR (DMSO):  $\delta$  2.12 (s, 3H, Ar- $CH_3$ ), 3.45 (bs, 2H, NH<sub>2</sub>), 4.62 (s, 2H,  $CH_2$ ), 7.2-7.7 (m, 7H, Ar-H), 9.45 (bs, 1H, CONH). MS:  $m/z$  318 (M+), 320 (M+2). Anal. Calcd. for  $C_{16}H_{15}ClN_2O_3$  (318): C, 60.29; H, 4.74; N, 8.79. Found: C, 60.32; H, 4.77; N, 8.83%.

### 2.1.5 Characterization data for 8(a-n)

**2-(4-Benzoyl-2-methylphenoxy)-N-(2-chlorobenzylidene) acetohydrazide 8a:** Yield 80%, M.P. 170-172°C. IR (Nujol): 1715 (C=O), 1670 (amide, C=O), 3130-3210 (NH-N), 1630  $cm^{-1}$  (N=CH).  $^1H$  NMR (DMSO):  $\delta$  2.12 (s, 3H, Ar- $CH_3$ ), 4.6 (s, 2H,  $CH_2$ ), 7.2-7.8 (m, 12H, Ar-H), 8.45 (s, 1H, N=CH), 9.55 (bs, 1H, CONH). MS:  $m/z$  407 (M+), 409 (M+2). Anal. Calcd. for  $C_{23}H_{19}ClN_2O_3$  (407): C, 67.90; H, 4.71; N, 6.89. Found: C, 67.94; H, 4.74; N, 6.92%.

**2-(4-benzoyl-2-methylphenoxy)-N'-(4-methoxybenzylidene) acetohydrazide 8b:** Yield 89%, M.P. 176-178°C. IR (Nujol): 1720 (C=O), 1675 (amide, C=O), 3130-3210 (NH-N), 1632  $cm^{-1}$  (N=CH).  $^1H$  NMR (DMSO):  $\delta$  2.12 (s, 3H, Ar- $CH_3$ ), 3.81 (s, 3H, Ar- $OCH_3$ ), 4.6 (s, 2H,  $CH_2$ ), 7.2-7.8 (m, 12H, Ar-H), 8.45 (s, 1H, N=CH), 9.55 (bs, 1H, CONH). MS:  $m/z$  403 (M+1). Anal. Calcd. for  $C_{24}H_{22}N_2O_4$  (402): C, 71.63; H, 5.51; N, 6.96. Found: C, 71.64; H, 5.52; N, 6.95%.

**2-(4-Benzoyl-2-methylphenoxy)-N-(4-hydroxybenzylidene) acetohydrazide 8c:** Yield 82%, M.P. 182-185°C. IR (Nujol): 1720 (C=O), 1680 (amide, C=O), 3130-3210 (NH-N), 1635  $cm^{-1}$  (N=CH).  $^1H$  NMR (DMSO):  $\delta$  2.12 (s, 3H, Ar- $CH_3$ ), 4.6 (s, 2H,  $CH_2$ ), 7.2-7.8 (m, 12H, Ar-H), 8.45 (s, 1H, N=CH), 9.55 (bs, 1H, CONH), 9.68 (s, 1H, Ar-OH). MS:  $m/z$  389 (M+1). Anal. Calcd. for  $C_{23}H_{20}N_2O_4$  (388): C, 71.12; H, 5.19; N, 7.21. Found: C, 71.14; H, 5.19; N, 7.20%.

**2-(4-Benzoyl-2-methylphenoxy)-N-(3-methylbenzylidene)**

**acetohydrazide 8d:** Yield 92%, M.P. 162-165°C. IR (Nujol): 1710 (C=O), 1675 (amide, C=O), 3130-3210 (NH-N), 1625 cm<sup>-1</sup> (N=CH). <sup>1</sup>H NMR (DMSO): δ 2.12 (s, 3H, Ar-CH<sub>3</sub>), 2.42 (s, 3H, Ar-CH<sub>3</sub>), 4.6 (s, 2H, CH<sub>2</sub>), 7.2-7.8 (m, 12H, Ar-H), 8.45 (s, 1H, N=CH), 9.55 (bs, 1H, CONH). MS: *m/z* 387 (M+1). Anal. Calcd. for C<sub>24</sub>H<sub>22</sub>N<sub>2</sub>O<sub>3</sub> (386): C, 74.59; H, 5.74; N, 7.25. Found: C, 74.57; H, 5.74; N, 7.25%.

**2-(4-Benzoyl-2-methylphenoxy)-N-(5-chloro-2-nitrobenzylidene)**

**acetohydrazide 8e:** Yield 89%, M.P. 192-194°C. IR (Nujol): 1715 (C=O), 1675 (amide, C=O), 3130-3210 (NH-N), 1625 cm<sup>-1</sup> (N=CH). <sup>1</sup>H NMR (DMSO): δ 2.12 (s, 3H, Ar-CH<sub>3</sub>), 4.6 (s, 2H, CH<sub>2</sub>), 7.2-8.2 (m, 11H, Ar-H), 8.45 (s, 1H, N=CH), 9.55 (bs, 1H, CONH). MS: *m/z* 452 (M+), 454 (M+2). Anal. Calcd. for C<sub>23</sub>H<sub>18</sub>ClN<sub>3</sub>O<sub>5</sub> (452): C, 61.14; H, 4.02; N, 9.30. Found: C, 61.13; H, 4.02; N, 9.28%.

**2-(4-Benzoyl-2-methylphenoxy)-N-(2-methoxybenzylidene)**

**acetohydrazide 8f:** Yield 92%, M.P. 196-198°C. IR (Nujol): 1720 (C=O), 1672 (amide, C=O), 3130-3210 (NH-N), 1638 cm<sup>-1</sup> (N=CH). <sup>1</sup>H NMR (DMSO): δ 2.12 (s, 3H, Ar-CH<sub>3</sub>), 3.82 (s, 3H, Ar-OCH<sub>3</sub>), 4.6 (s, 2H, CH<sub>2</sub>), 7.2-8.2 (m, 12H, Ar-H), 8.45 (s, 1H, N=CH), 9.55 (bs, 1H, CONH). MS: *m/z* 403 (M+1). Anal. Calcd. for C<sub>24</sub>H<sub>22</sub>N<sub>2</sub>O<sub>4</sub> (402): C, 71.63; H, 5.51; N, 6.96. Found: C, 71.61; H, 5.50; N, 6.95%.

**2-(4-Benzoyl-2-methylphenoxy)-N-(3-bromobenzylidene)**

**acetohydrazide 8g:** Yield 92%, M.P. 184-186°C. IR (Nujol): 1730 (C=O), 1675 (amide, C=O), 3130-3210 (NH-N), 1625 cm<sup>-1</sup> (N=CH). <sup>1</sup>H NMR (DMSO): δ 2.12 (s, 3H, Ar-CH<sub>3</sub>), 4.6 (s, 2H, CH<sub>2</sub>), 7.2-8.2 (m, 12H, Ar-H), 8.45 (s, 1H, N=CH), 9.55 (bs, 1H, CONH). MS: *m/z* 450 (M+), 452 (M+2). Anal. Calcd. for C<sub>23</sub>H<sub>19</sub>BrN<sub>2</sub>O<sub>3</sub> (450): C, 71.63; H, 5.51; N, 6.96. Found: C, 71.61; H, 5.50; N, 6.95%.

**2-(4-(2-Chlorobenzoyl)-2-methylphenoxy)-N-(2-chlorobenzylidene)**

**acetohydrazide 8h:** Yield 85%, M.P. 160-163°C. IR (Nujol): 1730 (C=O), 1670 (amide, C=O), 3130-3210 (NH-N), 1635 cm<sup>-1</sup> (N=CH). <sup>1</sup>H NMR (DMSO): δ 2.15 (s, 3H, Ar-CH<sub>3</sub>), 4.5 (s, 2H, CH<sub>2</sub>), 7.1-7.9 (m, 11H, Ar-H), 8.65 (s, 1H, N=CH), 9.35 (bs, 1H, CONH). MS: *m/z* 442 (M+), 443 (M+2). Anal. Calcd. for C<sub>23</sub>H<sub>18</sub>Cl<sub>2</sub>N<sub>2</sub>O<sub>3</sub> (442): C, 62.60; H, 4.11; N, 6.35. Found: C, 62.63; H, 4.14; N, 6.37%.

**2-(4-(2-Chlorobenzoyl)-2-methylphenoxy)-N-(4-methoxybenzylidene)**

**acetohydrazide 8i:** Yield 88%, M.P. 176-178°C. IR (Nujol): 1735 (C=O), 1670 (amide, C=O), 3130-3210 (NH-N), 1655 cm<sup>-1</sup> (N=CH). <sup>1</sup>H NMR (DMSO): δ 2.15 (s, 3H, Ar-CH<sub>3</sub>), 4.5 (s, 2H, CH<sub>2</sub>), 7.1-7.9 (m, 11H, Ar-H), 8.65 (s, 1H, N=CH), 9.35 (bs, 1H, CONH). MS: *m/z* 442 (M+), 444 (M+2). Anal. Calcd. for C<sub>23</sub>H<sub>18</sub>Cl<sub>2</sub>N<sub>2</sub>O<sub>3</sub> (442): C, 62.60; H, 4.11; N, 6.35. Found: C, 62.63; H, 4.14; N, 6.37%.

**2-(4-(2-Chlorobenzoyl)-2-methylphenoxy)-N-(4-hydroxybenzylidene)**

**acetohydrazide 8j:** Yield 82%, M.P. 192-194°C. IR (Nujol): 1730 (C=O), 1675 (amide, C=O), 3130-3210 (NH-N), 1648 cm<sup>-1</sup> (N=CH). <sup>1</sup>H NMR (DMSO): δ 2.15 (s, 3H, Ar-CH<sub>3</sub>), 4.5 (s, 2H, CH<sub>2</sub>), 7.1-7.9 (m, 11H, Ar-H), 8.65 (s, 1H, N=CH), 9.75 (bs, 1H, CONH), 9.98 (s, 1H, Ar-OH). MS: *m/z* 422 (M+), 424 (M+2). Anal. Calcd. for C<sub>23</sub>H<sub>19</sub>ClN<sub>2</sub>O<sub>4</sub> (422): C, 65.33; H, 4.53; N, 6.62. Found: C, 65.32; H, 4.52; N, 6.61%.

**2-(4-(2-Chlorobenzoyl)-2-methylphenoxy)-N-(3-methylbenzylidene)**

**acetohydrazide 8k:** Yield 87%, M.P. 179-181°C. IR (Nujol): 1732 (C=O), 1678 (amide, C=O), 3130-3210 (NH-N), 1655 cm<sup>-1</sup> (N=CH). <sup>1</sup>H NMR (DMSO): δ 2.15 (s, 3H, Ar-CH<sub>3</sub>), 2.42 (s, 3H, Ar-CH<sub>3</sub>), 4.5 (s, 2H, CH<sub>2</sub>), 7.1-7.9 (m, 11H, Ar-H), 8.65 (s, 1H, N=CH), 9.75 (bs, 1H,

CONH). MS:  $m/z$  420 (M<sup>+</sup>), 422(M+2). Anal. Calcd. for C<sub>24</sub>H<sub>21</sub>ClN<sub>2</sub>O<sub>3</sub> (420): C, 68.49; H, 5.03; N, 6.66. Found: C, 68.48; H, 5.02; N, 6.65%.

**2-(4-(2-Chlorobenzoyl)-2-methylphenoxy)-N-(5-chloro-2-nitrobenzylidene) acetohydrazide 8l:** Yield 89%, M.P. 192-194°C. IR (Nujol): 1740 (C=O), 1680 (amide,C=O), 3130-3210 (NH-N), 1655 cm<sup>-1</sup> (N=CH). <sup>1</sup>H NMR (DMSO):  $\delta$  2.15 (s, 3H, Ar-CH<sub>3</sub>), 4.5 (s, 2H, CH<sub>2</sub>), 7.1-7.9 (m, 10H, Ar-H), 8.65 (s, 1H, N=CH), 9.35 (bs, 1H, CONH). MS:  $m/z$  486 (M<sup>+</sup>), 488 (M+2). Anal. Calcd. for C<sub>23</sub>H<sub>17</sub>Cl<sub>2</sub>N<sub>3</sub>O<sub>5</sub> (486): C, 56.81; H, 3.52; N, 8.64. Found: C, 56.78; H, 3.52; N, 8.63%.

**2-(4-(2-Chlorobenzoyl)-2-methylphenoxy)-N-(2-methoxybenzylidene) acetohydrazide 8m:** Yield 89%, M.P. 182-185°C. IR (Nujol): 1735 (C=O), 1660 (amide,C=O), 3130-3210 (NH-N), 1655 cm<sup>-1</sup> (N=CH). <sup>1</sup>H NMR (DMSO):  $\delta$  2.15 (s, 3H, Ar-CH<sub>3</sub>), 3.42 (s, 3H, Ar-OCH<sub>3</sub>), 4.5 (s, 2H, CH<sub>2</sub>), 7.1-7.9 (m, 11H, Ar-H), 8.65 (s, 1H, N=CH), 9.75 (bs, 1H, CONH). MS:  $m/z$  436 (M<sup>+</sup>), 438 (M+2). Anal. Calcd. for C<sub>24</sub>H<sub>21</sub>ClN<sub>2</sub>O<sub>4</sub> (436): C, 65.98; H, 4.85; N, 6.41. Found: C, 65.97; H, 4.84; N, 6.4%.

**2-(4-(2-Chlorobenzoyl)-2-methylphenoxy)-N-(3-bromobenzylidene) acetohydrazide 8n:** Yield 85%, M.P. 195-197°C. IR (Nujol): 1740 (C=O), 1675 (amide,C=O), 3130-3210 (NH-N), 1645 cm<sup>-1</sup> (N=CH). <sup>1</sup>H NMR (DMSO):  $\delta$  2.15 (s, 3H, Ar-CH<sub>3</sub>), 4.5 (s, 2H, CH<sub>2</sub>), 7.1-7.9 (m, 11H, Ar-H), 8.65 (s, 1H, N=CH), 9.75 (bs, 1H, CONH). MS:  $m/z$  484 (M<sup>+</sup>), 486 (M+2). Anal. Calcd. for C<sub>23</sub>H<sub>18</sub>BrClN<sub>2</sub>O<sub>3</sub> (484): C, 56.87; H, 3.74; N, 5.77. Found: C, 56.86; H, 3.73; N, 5.76%.

#### 2.1.6. Characterization data for (9a-n)

**2-(4-Benzoyl-2-methylphenoxy)-N-[3-chloro-4-(2-chlorophenyl)-2-oxoazetidin-1-yl] acetamide 9a:** Yield 85%, M.P. 150-152°C. IR (Nujol): 1730 (C=O), 1655 cm<sup>-1</sup> (N-CO), 1670 (amide,C=O), 3130-3210cm<sup>-1</sup> (NH-N). <sup>1</sup>H NMR (DMSO):  $\delta$  2.14 (s, 3H, Ar-CH<sub>3</sub>), 4.6 (s, 2H, CH<sub>2</sub>), 5.45 (s, 1H, N-CH), 5.6 (s, 1H, Cl-CH), 6.75-7.77 (m, 12H, Ar-H), 11.12 (s, 1H, CONH). <sup>13</sup>C NMR (DMSO): 17.4 (1C, Ar-CH<sub>3</sub>), 62.3 (1C, Az-ring), 63.6 (1C, Az-Cl ring), 66.9 (1C, CH<sub>2</sub>), 113.9 (1C, Ar-C), 124.2 (1C,Ar-C), 126.6 (1C, Ar-C), 128.1 (1C,Ar-C), 128.3 (2C, Ar-C), 128.4 (2C, Ar-C), 128.6 (1C, Ar-C), 130.3 (2C, Ar-C), 131.5 (1C, Ar-C), 131.9 (1C, Ar-C), 132.2 (1C, Ar-C), 132.4 (1C, Ar-C), 138.4 (1C, Ar-C), 143.5 (1C, Ar-C), 162.3 (1C, Ar-C), 163.5 (1C, Az-C=O), 166.3 (1C, C=O amide), 194.3 (1C, Ar-C=O). MS:  $m/z$  483 (M<sup>+</sup>), 485 (M+2). Anal. Calcd. for C<sub>25</sub>H<sub>20</sub>Cl<sub>2</sub>N<sub>2</sub>O<sub>4</sub> (483): C, 62.12; H, 4.17; N, 5.80. Found: C, 62.14; H, 4.15; N, 5.81%.

**2-(4-Benzoyl-2-methylphenoxy)-N-[3-chloro-4-(4-methoxyphenyl)-2-oxoazetidin-1-yl] acetamide 9b:** Yield 74%, M.P. 162-165°C. IR (Nujol): 1735 (C=O), 1665 (amide,C=O), 1636 (N-CO), 3130-3215 cm<sup>-1</sup> (NH-N). <sup>1</sup>H NMR (DMSO):  $\delta$  2.12 (s, 3H, Ar-CH<sub>3</sub>), 4.2 (s, 3H, O-CH<sub>3</sub>), 4.5 (s, 2H, CH<sub>2</sub>), 5.46 (s, 1H, N-CH), 5.8 (s, 1H, Cl-CH), 6.77-7.76 (m, 12H, Ar-H), 9.56 (bs, 1H, CONH). <sup>13</sup>C NMR (DMSO): 16.3 (1C, Ar-CH<sub>3</sub>), 55.8 (1C, Ar-OCH<sub>3</sub>), 64.1 (1C, Az-ring), 66.9 (1C, Az-Cl ring), 67.4 (1C, CH<sub>2</sub>), 113.9 (1C, Ar-C), 114.1 (2C, Ar-C), 124.2 (1C,Ar-C), 126.6 (2C, Ar-C), 128.1 (1C, Ar-C), 128.3 (1C, Ar-C), 128.4 (2C, Ar-C), 130.3 (2C, Ar-C), 131.5 (1C, Ar-C), 131.9 (1C, Ar-C), 132.4 (1C, Ar-C), 138.4 (1C, Ar-C), 143.5 (1C, Ar-C), 162.3 (1C, Ar-C), 163.5 (1C, Az-C=O), 166.3 (1C, C=O amide), 194.3 (1C, Ar-C=O). MS:  $m/z$  478 (M<sup>+</sup>), 480 (M+2). Anal. Calcd. for C<sub>26</sub>H<sub>23</sub>ClN<sub>2</sub>O<sub>5</sub> (478): C, 65.20; H, 4.84; N, 5.85. Found: C, 65.22; H, 4.86; N, 5.86. %.

**2-(4-Benzoyl-2-methylphenoxy)-N-3-chloro-4-(4-hydroxyphenyl)-2-oxoazetidin-1-yl] acetamide 9c:** Yield 70%, M.P. 142-145°C. IR (Nujol): 1730 (C=O), 1668 (amide,C=O), 1636 (N-CO), 3130-3215 (NH-N) 3530-3600

cm<sup>-1</sup> (OH). <sup>1</sup>H NMR (DMSO):  $\delta$ 2.15 (s, 3H, Ar-CH<sub>3</sub>), 4.5 (s, 2H, CH<sub>2</sub>), 5.46 (s, 1H, N-CH), 5.8 (s, 1H, Cl-CH), 6.75-7.78 (m, 12H, Ar-H), 9.06 (s, 1H, Ar-OH), 9.54 (bs, 1H, CONH). <sup>13</sup>C NMR (DMSO): 15.7 (1C, Ar-CH<sub>3</sub>), 64.1 (1C, Az-ring), 66.9 (1C, Az-Cl ring), 67.3 (1C, CH<sub>2</sub>), 113.7 (1C, Ar-C), 115.4 (2C, Ar-C), 124.2 (1C, Ar-C), 127.2 (2C, Ar-C), 128.1 (1C, Ar-C), 128.3 (1C, Ar-C), 128.4 (2C, Ar-C), 130.3 (2C, Ar-C), 131.5 (1C, Ar-C), 131.9 (1C, Ar-C), 132.4 (1C, Ar-C), 138.4 (1C, Ar-C), 143.5 (1C, Ar-C), 162.3 (1C, Ar-C), 163.3 (1C, Az-C=O), 166.3 (1C, C=O amide), 194.3 (1C, Ar-C=O). MS: *m/z* 464 (M<sup>+</sup>), 466 (M+2). Anal. Calcd. for C<sub>25</sub>H<sub>21</sub>ClN<sub>2</sub>O<sub>5</sub> (464): C, 64.59; H, 4.55; N, 6.03. Found: C, 64.55; H, 4.57; N, 6.01%.

**2-(4-Benzoyl-2-methylphenoxy)-N-[3-chloro-4-(3-methylphenyl)-2-oxoazetidin-1-yl] acetamide 9d:** Yield 78%, M.P. 152-155°C. IR (Nujol): 1730 (C=O), 1668 (amide, C=O), 1636 cm<sup>-1</sup> (N-CO), 3130-3215 cm<sup>-1</sup> (NH-N). <sup>1</sup>H NMR (DMSO):  $\delta$ 2.15 (s, 3H, Ar-CH<sub>3</sub>), 2.21 (s, 3H, Ar-CH<sub>3</sub>), 4.6 (s, 2H, CH<sub>2</sub>), 5.48 (s, 1H, N-CH), 5.6 (s, 1H, Cl-CH), 6.71-7.76 (m, 12H, Ar-H), 9.55 (bs, 1H, CONH). <sup>13</sup>C NMR (DMSO): 15.6 (1C, Ar-CH<sub>3</sub>), 21.6 (1C, Ar-CH<sub>3</sub>), 64.1 (1C, Az-ring), 66.9 (1C, CH<sub>2</sub>), 67.7 (1C, Az-Cl ring), 113.9 (1C, Ar-C), 123.9 (1C, Ar-C), 124.2 (1C, Ar-C), 126.7 (1C, Ar-C), 127.0 (1C, Ar-C), 128.0 (1C, Ar-C), 128.1 (1C, Ar-C), 128.3 (1C, Ar-C), 128.4 (2C, Ar-C), 130.3 (2C, Ar-C), 131.5 (1C, Ar-C), 131.9 (1C, Ar-C), 132.4 (1C, Ar-C), 138.2 (1C, Ar-C), 143.4 (1C, Ar-C), 162.3 (1C, Ar-C), 163.4 (1C, Az-C=O), 166.5 (1C, C=O amide), 193.3 (1C, Ar-C=O). MS: *m/z* 462 (M<sup>+</sup>), 464 (M+2). Anal. Calcd. for C<sub>26</sub>H<sub>23</sub>ClN<sub>2</sub>O<sub>4</sub> (462): C, 67.46; H, 5.01; N, 6.05. Found: C, 67.45; H, 5.04; N, 6.02%.

**2-(4-Benzoyl-2-methylphenoxy)-N-[3-chloro-4-(5-chloro-2-nitrophenyl)-2-oxoazetidin-1-yl] acetamide 9e:** Yield 78%, M.P. 161-162°C. IR (Nujol): 1560 (NO<sub>2</sub>), 1730 (C=O), 1668 (amide, C=O), 1636 cm<sup>-1</sup> (N-CO), 3130-3215 cm<sup>-1</sup> (NH-N). <sup>1</sup>H NMR (DMSO):  $\delta$ 2.12 (s, 3H, Ar-CH<sub>3</sub>), 2.25 (s, 3H, Ar-CH<sub>3</sub>), 4.4 (s, 2H, CH<sub>2</sub>), 5.46 (s, 1H, N-CH), 5.5 (s, 1H, Cl-CH), 6.7-7.78 (m, 10H, Ar-H), 9.54 (bs, 1H, CONH). <sup>13</sup>C NMR (DMSO): 16.6 (1C, Ar-CH<sub>3</sub>), 62.3 (1C, Az-ring), 63.4 (1C, Az-Cl ring), 66.7 (1C, CH<sub>2</sub>), 113.9 (1C, Ar-C), 124.2 (1C, Ar-C), 126.4 (1C, Ar-C), 127.6 (1C, Ar-C), 127.7 (1C, Ar-C), 128.3 (1C, Ar-C), 128.4 (2C, Ar-C), 128.6 (1C, Ar-C), 130.3 (2C, Ar-C), 131.5 (1C, Ar-C), 131.9 (1C, Ar-C), 132.4 (1C, Ar-C), 138.4 (1C, Ar-C), 140.2 (1C, Ar-C), 145.3 (1C, Ar-C), 162.3 (1C, Ar-C), 163.5 (1C, Az-C=O), 166.3 (1C, C=O amide), 194.3 (1C, Ar-C=O). MS: *m/z* 527 (M<sup>+</sup>), 529 (M+2). Anal. Calcd. for C<sub>25</sub>H<sub>19</sub>Cl<sub>2</sub>N<sub>3</sub>O<sub>6</sub> (527): C, 56.82; H, 3.64; N, 7.95. Found: C, 56.84; H, 3.63; N, 7.93%.

**2-(4-Benzoyl-2-methylphenoxy)-N-[3-chloro-4-(2-methoxyphenyl)-2-oxoazetidin-1-yl] acetamide 9f:** Yield 78%, M.P. 164-167°C. IR (Nujol): 1735 (C=O), 1665 (amide, C=O), 1636 (N-CO), 3130-3215 cm<sup>-1</sup> (NH-N). <sup>1</sup>H NMR (DMSO):  $\delta$ 2.12 (s, 3H, Ar-CH<sub>3</sub>), 4.2 (s, 3H, O-CH<sub>3</sub>), 4.5 (s, 2H, CH<sub>2</sub>), 5.46 (s, 1H, N-CH), 5.8 (s, 1H, Cl-CH), 6.77-7.76 (m, 12H, Ar-H), 9.56 (bs, 1H, CONH). <sup>13</sup>C NMR (DMSO): 15.9 (1C, Ar-CH<sub>3</sub>), 56.2 (1C, Ar-CH<sub>3</sub>), 61.5 (1C, Az-ring), 64.4 (1C, Az-Cl ring), 66.9 (1C, CH<sub>2</sub>), 112.1 (1C, Ar-C), 113.9 (1C, Ar-C), 120.9 (1C, Ar-C), 124.2 (1C, Ar-C), 127.7 (1C, Ar-C), 128.1 (1C, Ar-C), 128.3 (1C, Ar-C), 128.4 (2C, Ar-C), 129.3 (1C, Ar-C), 130.3 (2C, Ar-C), 131.5 (1C, Ar-C), 131.9 (1C, Ar-C), 132.4 (1C, Ar-C), 138.4 (1C, Ar-C), 156.4 (1C, Ar-C), 162.3 (1C, Ar-C), 163.4 (1C, Az-C=O), 166.5 (1C, C=O amide), 193.3 (1C, Ar-C=O). MS: *m/z* 478 (M<sup>+</sup>), 480 (M+2). Anal. Calcd. for C<sub>26</sub>H<sub>23</sub>ClN<sub>2</sub>O<sub>5</sub> (478): C, 65.20; H, 4.84; N, 5.85. Found: C, 65.22; H, 4.86; N, 5.86. %.

**2-(4-Benzoyl-2-methylphenoxy)-N-[4-(3-bromophenyl)-3-chloro-2-oxoazetidin-1-yl] acetamide 9g:** Yield 85%, M.P. 170-172°C. IR (Nujol):

1730 (C=O), 1655 cm<sup>-1</sup> (N-CO), 1670 (amide, C=O), 3130-3210 cm<sup>-1</sup> (NH-N). <sup>1</sup>H NMR (DMSO): δ2.19 (s, 3H, Ar-CH<sub>3</sub>), 4.2 (s, 2H, CH<sub>2</sub>), 5.46 (s, 1H, N-CH), 5.7 (s, 1H, Cl-CH), 6.75-7.77 (m, 12H, Ar-H), 9.55 (bs, 1H, CONH). <sup>13</sup>C NMR (DMSO): 15.8 (1C, Ar-CH<sub>3</sub>), 64.1 (1C, Az-Cl ring), 66.7 (1C, Az-ring), 66.9 (1C, CH<sub>2</sub>), 113.9 (1C, Ar-C), 122.9 (1C, Ar-C), 124.2 (1C, Ar-C), 125.9 (1C, Ar-C), 128.3 (1C, Ar-C), 128.4 (2C, Ar-C), 129.3 (1C, Ar-C), 129.6 (1C, Ar-C), 130.3 (2C, Ar-C), 131.5 (1C, Ar-C), 131.7 (1C, Ar-C), 131.9 (1C, Ar-C), 132.4 (1C, Ar-C), 138.4 (1C, Ar-C), 145.7 (1C, Ar-C), 162.3 (1C, Ar-C), 163.5 (1C, Az-C=O), 166.3 (1C, C=O amide), 194.3 (1C, Ar-C=O). MS: *m/z* 526 (M<sup>+</sup>), 528 (M+2). Anal. Calcd. for C<sub>25</sub>H<sub>20</sub>BrClN<sub>2</sub>O<sub>4</sub> (526): C, 56.89; H, 3.82; N, 5.31. Found: C, 56.87; H, 3.84; N, 5.33%.

**2-(4-(2-Chlorobenzoyl)-2-methylphenoxy)-N-[3-chloro-4-(2-chlorophenyl)-2-oxoazetidin-1-yl]acetamide 9h:** Yield 85%, M.P. 150-152°C. IR (Nujol): 1730 (C=O), 1655 cm<sup>-1</sup> (N-CO), 1670 (amide, C=O), 3130-3210 cm<sup>-1</sup> (NH-N). <sup>1</sup>H NMR (DMSO): δ2.14 (s, 3H, Ar-CH<sub>3</sub>), 4.6 (s, 2H, CH<sub>2</sub>), 5.45 (s, 1H, N-CH), 5.6 (s, 1H, Cl-CH), 6.75-7.77 (m, 11H, Ar-H), 9.55 (bs, 1H, CONH). <sup>13</sup>C NMR (DMSO): 15.6 (1C, Ar-CH<sub>3</sub>), 62.3 (1C, Az-ring), 63.6 (1C, Az-Cl ring), 66.9 (1C, CH<sub>2</sub>), 113.9 (1C, Ar-C), 124.2 (1C, Ar-C), 126.5 (1C, Ar-C), 126.6 (1C, Ar-C), 128.1 (1C, Ar-C), 128.3 (1C, Ar-C), 128.4 (1C, Ar-C), 128.5 (1C, Ar-C), 128.6 (1C, Ar-C), 131.5 (1C, Ar-C), 131.9 (1C, Ar-C), 132.2 (1C, Ar-C), 132.4 (1C, Ar-C), 133.8 (1C, Ar-C), 136.4 (1C, Ar-C), 139.3 (1C, Ar-C), 143.5 (1C, Ar-C), 162.3 (1C, Ar-C), 163.5 (1C, Az-C=O), 166.3 (1C, C=O amide), 194.3 (1C, Ar-C=O). MS: *m/z* 517 (M<sup>+</sup>), 518 (M+2), 520 (M+4). Anal. Calcd. for C<sub>25</sub>H<sub>19</sub>Cl<sub>3</sub>N<sub>2</sub>O<sub>4</sub> (516): C, 57.99; H, 3.70; N, 5.41. Found: C, 57.97; H, 3.72; N, 5.43%.

**2-(4-(2-Chlorobenzoyl)-2-methylphenoxy)-N-[3-chloro-4-(4-methoxyphenyl)-2-oxoazetidin-1-yl]acetamide 9i:** Yield 74%, M.P. 166-167°C. IR (Nujol): 1735 (C=O), 1665 (amide, C=O), 1636 (N-CO), 3130-3215 cm<sup>-1</sup> (NH-N). <sup>1</sup>H NMR (DMSO): δ2.12 (s, 3H, Ar-CH<sub>3</sub>), 4.2 (s, 3H, O-CH<sub>3</sub>), 4.5 (s, 2H, CH<sub>2</sub>), 5.46 (s, 1H, N-CH), 5.8 (s, 1H, Cl-CH), 6.77-7.76 (m, 11H, Ar-H), 9.56 (bs, 1H, CONH). <sup>13</sup>C NMR (DMSO): 16.4 (1C, Ar-CH<sub>3</sub>), 55.8 (1C, Ar-OCH<sub>3</sub>), 64.1 (1C, Az-Cl ring), 66.9 (1C, CH<sub>2</sub>), 67.4 (1C, Az-ring), 113.9 (1C, Ar-C), 114.1 (2C, Ar-C), 124.2 (1C, Ar-C), 126.5 (1C, Ar-C), 126.6 (2C, Ar-C), 128.3 (1C, Ar-C), 128.5 (1C, Ar-C), 129.7 (1C, Ar-C), 131.5 (1C, Ar-C), 131.9 (1C, Ar-C), 133.8 (1C, Ar-C), 135.8 (1C, Ar-C), 136.4 (1C, Ar-C), 139.3 (1C, Ar-C), 158.6 (1C, Ar-C), 162.3 (1C, Ar-C), 163.5 (1C, Az-C=O), 166.3 (1C, C=O amide), 194.3 (1C, Ar-C=O). MS: *m/z* 512 (M<sup>+</sup>), 514 (M+2). Anal. Calcd. for C<sub>26</sub>H<sub>22</sub>Cl<sub>2</sub>N<sub>2</sub>O<sub>5</sub> (512): C, 60.83; H, 4.32; N, 5.46. Found: C, 60.85; H, 4.35; N, 5.47%.

**2-(4-(2-Chlorobenzoyl)-2-methylphenoxy)-N-[3-chloro-4-(4-hydroxyphenyl)-2-oxoazetidin-1-yl] acetamide 9j:** Yield 70%, M.P. 140-143°C. IR (Nujol): 1730 (C=O), 1668 (amide, C=O), 1636 (N-CO), 3130-3215 (NH-N) 3530-3600 cm<sup>-1</sup> (OH). <sup>1</sup>H NMR (DMSO): δ2.15 (s, 3H, Ar-CH<sub>3</sub>), 4.5 (s, 2H, CH<sub>2</sub>), 4.8 (bs, 1H, -OH), 5.46 (s, 1H, N-CH), 5.8 (s, 1H, Cl-CH), 6.75-7.78 (m, 11H, Ar-H), 9.54 (bs, 1H, CONH). <sup>13</sup>C NMR (DMSO): 15.8 (1C, Ar-CH<sub>3</sub>), 64.1 (1C, Az-Cl ring), 66.9 (1C, CH<sub>2</sub>), 67.4 (1C, Az-ring), 113.9 (1C, Ar-C), 115.7 (2C, Ar-C), 124.2 (1C, Ar-C), 126.5 (1C, Ar-C), 127.2 (2C, Ar-C), 128.3 (1C, Ar-C), 128.5 (1C, Ar-C), 129.7 (1C, Ar-C), 131.5 (1C, Ar-C), 131.9 (1C, Ar-C), 133.8 (1C, Ar-C), 136.1 (1C, Ar-C), 136.4 (1C, Ar-C), 139.3 (1C, Ar-C), 156.5 (1C, Ar-C), 162.3 (1C, Ar-C), 163.5 (1C, Az-C=O), 166.3 (1C, C=O amide), 194.3 (1C, Ar-C=O). MS: *m/z* 464 (M<sup>+</sup>), 466 (M+2). Anal. Calcd. for C<sub>25</sub>H<sub>20</sub>Cl<sub>2</sub>N<sub>2</sub>O<sub>5</sub> (464): C, 60.13; H, 4.04; N, 5.61. Found: C, 60.15; H, 4.06; N, 5.63%.

**2-(4-(2-Chlorobenzoyl)-2-methylphenoxy)-N-[3-chloro-4-(3-methylphenyl)-2-oxoazetidin-1-yl]acetamide 9k:** Yield 78%, M.P. 152-155°C. IR (Nujol): 1730 (C=O), 1668 (amide, C=O), 1636 cm<sup>-1</sup> (N-CO), 3130-3215 cm<sup>-1</sup> (NH-N). <sup>1</sup>H NMR (DMSO):  $\delta$ 2.15 (s, 3H, Ar-CH<sub>3</sub>), 2.21 (s, 3H, Ar-CH<sub>3</sub>), 4.6 (s, 2H, CH<sub>2</sub>), 5.48 (s, 1H, N-CH), 5.6 (s, 1H, Cl-CH), 6.71-7.76 (m, 11H, Ar-H), 9.55 (bs, 1H, CONH). <sup>13</sup>C NMR (DMSO): 15.7 (1C, Ar-CH<sub>3</sub>), 21.5 (1C, Ar-C), 64.1 (1C, Az-Cl ring), 66.9 (1C, CH<sub>2</sub>), 67.4 (1C, Az-ring), 113.9 (1C, Ar-C), 123.9 (1C, Ar-C), 124.2 (1C, Ar-C), 126.5 (1C, Ar-C), 126.7 (1C, Ar-C), 127.0 (1C, Ar-C), 127.2 (1C, Ar-C), 128.3 (1C, Ar-C), 128.5 (1C, Ar-C), 129.7 (1C, Ar-C), 131.5 (1C, Ar-C), 131.9 (1C, Ar-C), 133.8 (1C, Ar-C), 136.1 (1C, Ar-C), 136.4 (1C, Ar-C), 139.3 (1C, Ar-C), 156.5 (1C, Ar-C), 162.3 (1C, Ar-C), 163.5 (1C, Az-C=O), 166.3 (1C, C=O amide), 194.3 (1C, Ar-C=O). MS: *m/z* 496 (M<sup>+</sup>), 498 (M+2). Anal. Calcd. for C<sub>26</sub>H<sub>22</sub>Cl<sub>2</sub>N<sub>2</sub>O<sub>4</sub> (496): C, 62.79; H, 4.46; N, 5.63. Found: C, 62.76; H, 4.44; N, 5.65%.

**2-(4-(2-Chlorobenzoyl)-2-methylphenoxy)-N-[3-chloro-4-(5-chloro-2-nitrophenyl)-2-oxoazetidin-1-yl]acetamide 9l:** Yield 78%, M.P. 151-152 °C. IR (Nujol): 1560 (NO<sub>2</sub>), 1730 (C=O), 1668 (amide, C=O), 1636 cm<sup>-1</sup> (N-CO), 3130-3215 cm<sup>-1</sup> (NH-N). <sup>1</sup>H NMR (DMSO):  $\delta$ 2.12 (s, 3H, Ar-CH<sub>3</sub>), 2.25 (s, 3H, Ar-CH<sub>3</sub>), 4.4 (s, 2H, CH<sub>2</sub>), 5.46 (s, 1H, N-CH), 5.5 (s, 1H, Cl-CH), 6.7-7.78 (m, 9H, Ar-H), 9.54 (bs, 1H, CONH). <sup>13</sup>C NMR (DMSO): 16.6 (1C, Ar-CH<sub>3</sub>), 62.3 (1C, Az-ring), 63.4 (1C, Az-Cl ring), 66.9 (1C, CH<sub>2</sub>), 113.9 (1C, Ar-C), 124.2 (1C, Ar-C), 124.3 (1C, Ar-C), 126.4 (1C, Ar-C), 126.5 (1C, Ar-C), 127.6 (1C, Ar-C), 127.7 (1C, Ar-C), 128.5 (1C, Ar-C), 129.7 (1C, Ar-C), 131.5 (1C, Ar-C), 131.9 (1C, Ar-C), 133.4 (1C, Ar-C), 136.4 (1C, Ar-C), 138.4 (1C, Ar-C), 139.3 (1C, Ar-C), 140.2 (1C, Ar-C), 145.3 (1C, Ar-C), 162.3 (1C, Ar-C), 163.5 (1C, Az-C=O), 166.3 (1C, C=O amide), 194.3 (1C, Ar-C=O). MS: *m/z* 561 (M<sup>+</sup>), 563 (M+2). Anal. Calcd. for C<sub>25</sub>H<sub>18</sub>Cl<sub>3</sub>N<sub>3</sub>O<sub>6</sub> (561): C, 53.35; H, 3.22; N, 7.47. Found: C, 53.36; H, 3.24; N, 7.46%.

**2-(4-(2-Chlorobenzoyl)-2-methylphenoxy)-N-[3-chloro-4-(2-methoxyphenyl)-2-oxoazetidin-1-yl]acetamide 9m:** Yield 74%, M.P. 167-168°C. IR (Nujol): 1735 (C=O), 1665 (amide, C=O), 1636 (N-CO), 3130-3215 cm<sup>-1</sup> (NH-N). <sup>1</sup>H NMR (DMSO):  $\delta$ 2.12 (s, 3H, Ar-CH<sub>3</sub>), 4.2 (s, 3H, O-CH<sub>3</sub>), 4.5 (s, 2H, CH<sub>2</sub>), 5.46 (s, 1H, N-CH), 5.8 (s, 1H, Cl-CH), 6.77-7.76 (m, 11H, Ar-H), 9.56 (bs, 1H, CONH). <sup>13</sup>C NMR (DMSO): 15.9 (1C, Ar-CH<sub>3</sub>), 56.9 (1C, Ar-CH<sub>3</sub>), 61.5 (1C, Az-ring), 64.4 (1C, Az-Cl ring), 66.9 (1C, CH<sub>2</sub>), 112.1 (1C, Ar-C), 113.9 (1C, Ar-C), 120.9 (1C, Ar-C), 124.2 (1C, Ar-C), 126.1 (1C, Ar-C), 126.5 (1C, Ar-C), 127.7 (1C, Ar-C), 128.3 (1C, Ar-C), 128.5 (1C, Ar-C), 129.3 (1C, Ar-C), 129.7 (1C, Ar-C), 131.5 (1C, Ar-C), 131.9 (1C, Ar-C), 133.8 (1C, Ar-C), 136.4 (1C, Ar-C), 139.4 (1C, Ar-C), 156.4 (1C, Ar-C), 162.3 (1C, Ar-C), 163.4 (1C, Az-C=O), 166.5 (1C, C=O amide), 193.3 (1C, Ar-C=O). MS: *m/z* 512 (M<sup>+</sup>), 514 (M+2). Anal. Calcd. for C<sub>26</sub>H<sub>22</sub>Cl<sub>2</sub>N<sub>2</sub>O<sub>5</sub> (512): C, 60.83; H, 4.32; N, 5.46. Found: C, 60.85; H, 4.35; N, 5.47%.

**2-(4-(2-Chlorobenzoyl)-2-methylphenoxy)-N-[3-chloro-4-(3-bromophenyl)-2-oxoazetidin-1-yl]acetamide 9n:** Yield 85%, M.P. 172-174°C. IR (Nujol): 1730 (C=O), 1655 cm<sup>-1</sup> (N-CO), 1670 (amide, C=O), 3130-3210 cm<sup>-1</sup> (NH-N). <sup>1</sup>H NMR (DMSO):  $\delta$ 2.19 (s, 3H, Ar-CH<sub>3</sub>), 4.2 (s, 2H, CH<sub>2</sub>), 5.46 (s, 1H, N-CH), 5.7 (s, 1H, Cl-CH), 6.75-7.77 (m, 11H, Ar-H), 9.55 (bs, 1H, CONH). <sup>13</sup>C NMR (DMSO): 15.7 (1C, Ar-CH<sub>3</sub>), 61.5 (1C, Az-ring), 64.4 (1C, Az-Cl ring), 66.9 (1C, CH<sub>2</sub>), 112.1 (1C, Ar-C), 113.9 (1C, Ar-C), 122.9 (1C, Ar-C), 124.2 (1C, Ar-C), 125.9 (1C, Ar-C), 126.5 (1C, Ar-C), 128.3 (1C, Ar-C), 128.5 (1C, Ar-C), 129.3 (1C, Ar-C), 129.6 (1C, Ar-C), 129.7 (1C,

Ar-C), 131.5 (1C, Ar-C), 131.9 (1C, Ar-C), 133.8 (1C, Ar-C), 136.4 (1C, Ar-C), 139.4 (1C, Ar-C), 145.4 (1C, Ar-C), 162.3 (1C, Ar-C), 163.4 (1C, Az-C=O), 166.5 (1C, C=O amide), 193.3 (1C, Ar-C=O).MS:  $m/z$ 560 (M+1), 561 (M+2). Anal. Calcd. for  $C_{25}H_{19}BrCl_2N_2O_4$  (559): C, 53.41; H, 3.41; N, 4.98. Found: C, 53.45; H, 3.43; N, 4.95%.

### <sup>1</sup>H NMR for 2-Methylphenyl benzoate (3a)

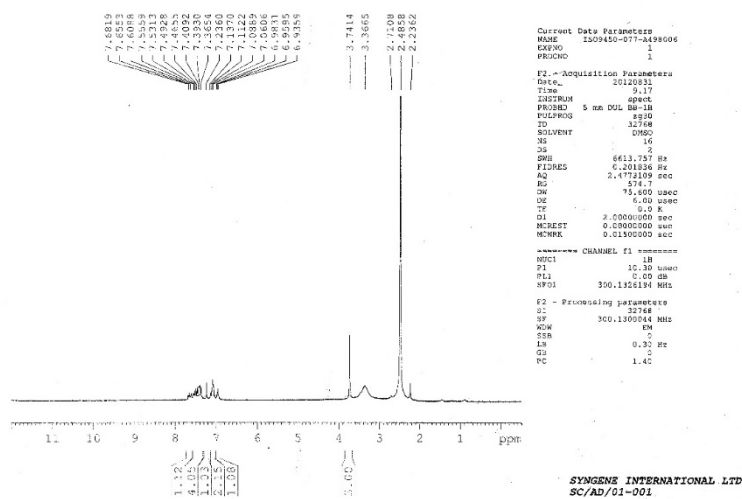

# <sup>1</sup>H NMR for (4-Hydroxy-3-methylphenyl)(phenyl)methanone (4a)

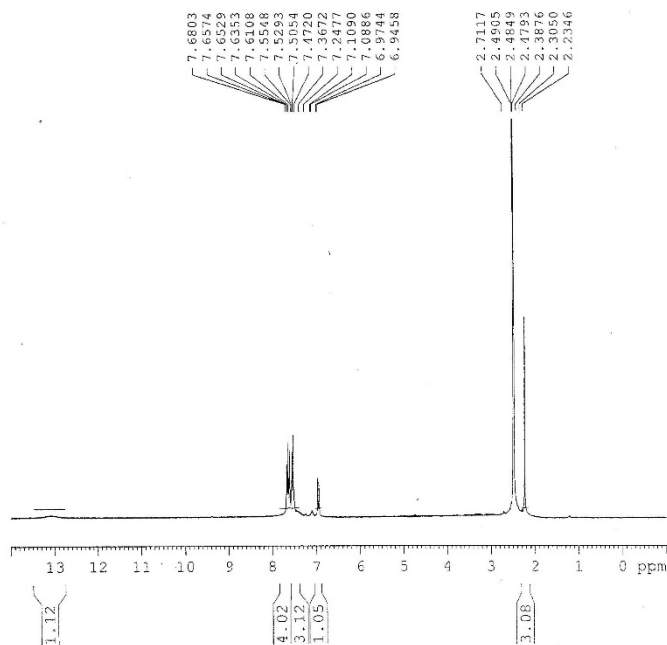

Current Data Parameters  
NAME ISO9448-036-A470054  
EXPNO 1  
PROCNO 1

F2 - Acquisition Parameters  
Date\_ 20120725  
Time 9.35  
INSTRUM spect  
PROBHD 5 mm DUL BB-1H  
PULPROG zg30  
TD 32768  
SOLVENT DMSO  
NS 16  
DS 2  
SWH 6613.757 Hz  
FIDRES 0.201836 Hz  
AQ 2.4773109 sec  
RG 645.1  
DN 75.600 usec  
DE 6.00 usec  
TE 300 K  
D1 2.00000000 sec  
MCREST 0.00000000 sec  
MCWRK 0.01500000 sec

----- CHANNEL f1 -----  
NUC1 1H  
P1 10.30 usec  
PL1 0.00 dB  
SFO1 300.1326194 MHz

F2 - Processing parameters  
SI 32768  
SF 300.1300044 MHz  
WDW EM  
SSB 0  
LB 0.30 Hz  
GB 0  
PC 1.40

SYNGENE INTERNATIONAL I  
SC/AD/01-001

**<sup>1</sup>H NMR for Ethyl 2-(4-(2-chlorobenzoyl)-2-methylphenoxy)acetate (5b)**

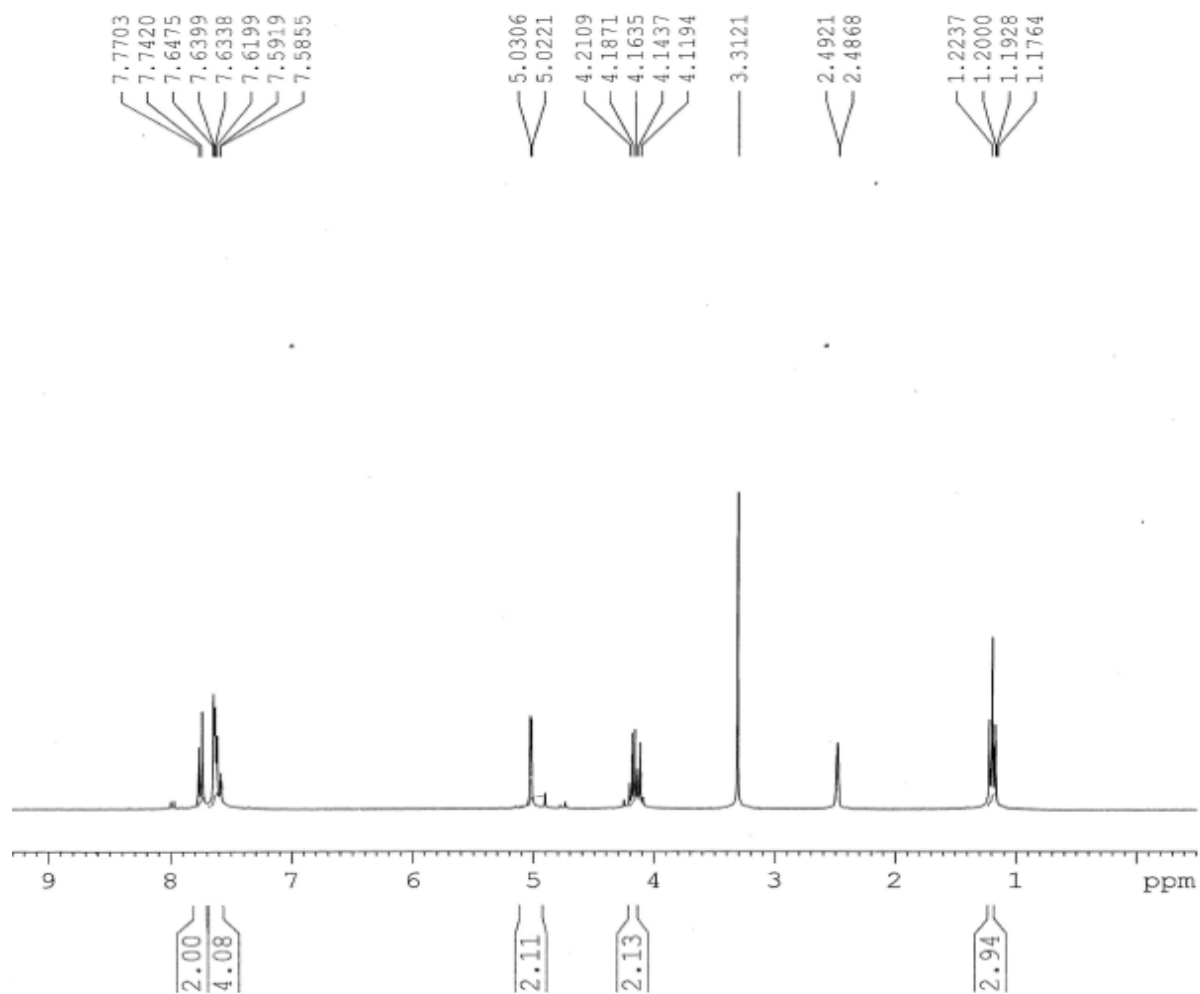

# <sup>1</sup>H NMR for 2-(4-Benzoyl-2-methylphenoxy)acetohydrazide (6a)

FS08458-004-A542075

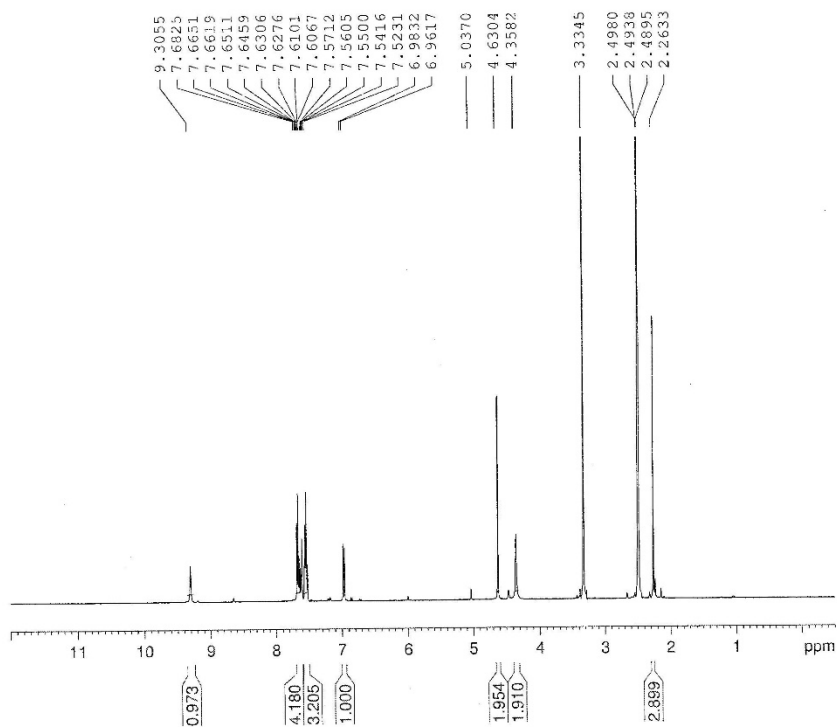

Current Data Parameters  
NAME FS08458-004-A542075  
EXPNO 1  
PROCNO 1

F2 - Acquisition Parameters  
Date\_ 20121031  
Time 19.20  
INSTRUM spect  
PROBHD 5 mm PABBO BB-  
PULPROG zg30  
TD 32768  
SOLVENT DMSO  
NS 16  
DS 2  
SWH 8802.817 Hz  
FIDRES 0.268641 Hz  
AQ 1.8612723 sec  
RG 512  
DW 56.800 usec  
DE 6.00 usec  
TE 273.2 K  
D1 2.00000000 sec  
TD0 1

===== CHANNEL f1 =====  
NUC1 1H  
P1 14.00 usec  
PL1 0.00 dB  
SFO1 400.1532012 MHz

F2 - Processing parameters  
SI 32768  
SF 400.1500000 MHz  
WDW EM  
SSB 0  
LB 0.30 Hz  
GB 0  
PC 1.00

SYNGENE INTERNATIONAL LTD.  
SC/AD/01-003

**<sup>1</sup>H NMR for 2-(4-Benzoyl-2-methylphenoxy)-N-(2-chlorobenzylidene)acetohydrazide**

**(8a)**

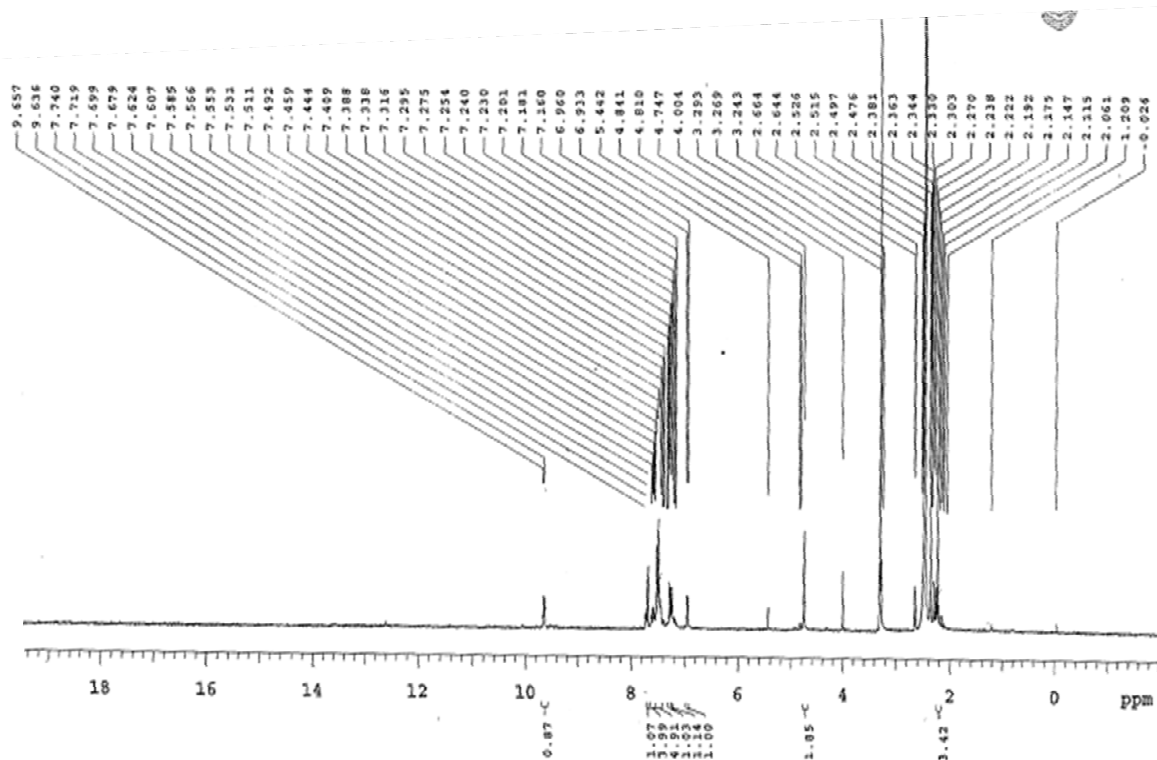

**2-(4-Benzoyl-2-methylphenoxy)-N-[3-chloro-4-(2-chlorophenyl)-2-oxoazetidin-1-yl]  
acetamide (9a)**

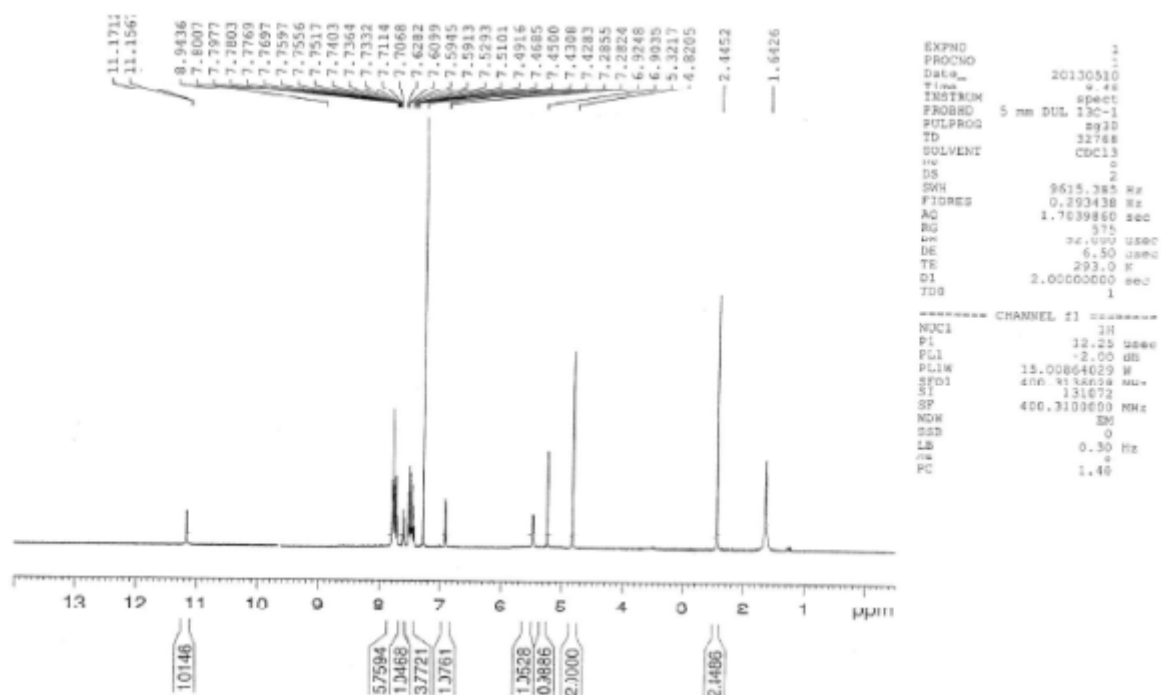

Supplement: s1 [file s1]
